# Supplementary material for: Pathways of thymidine hypermodification
Source: PubMed Central journal article supplement — Nucleic Acids Res. 2021 Sep 15;50(6):3001–17. doi: 10.1093/nar/gkab781 (PMC8989533; doi:10.1093/nar/gkab781), 2021-09-15
Supplement: gkab781_supplemental_file.pdf [file gkab781_supplemental_file.pdf]

# Supplementary Information for

## Pathways of thymidine hypermodification

Yan-Jiun Lee, Nan Dai, Stephanie I. Müller, Chudi Guan, Mackenzie J. Parker, Morgan E. Fraser, Shannon E. Walsh, Janani Sridar, Andrew Mulholland, Krutika Nayak, Zhiyi Sun, YuCheng Lin, Donald G. Comb, Katherine Marks, Reyaz Gonzalez, Daniel P. Dowling, Vahe Bandarian, Lana Saleh, Ivan Corrêa Jr., and Peter R. Weigele

Correspondence to: [weigele@neb.com](mailto:weigele@neb.com)

### **This PDF file includes:**

Figures S1 to S21

Table S1

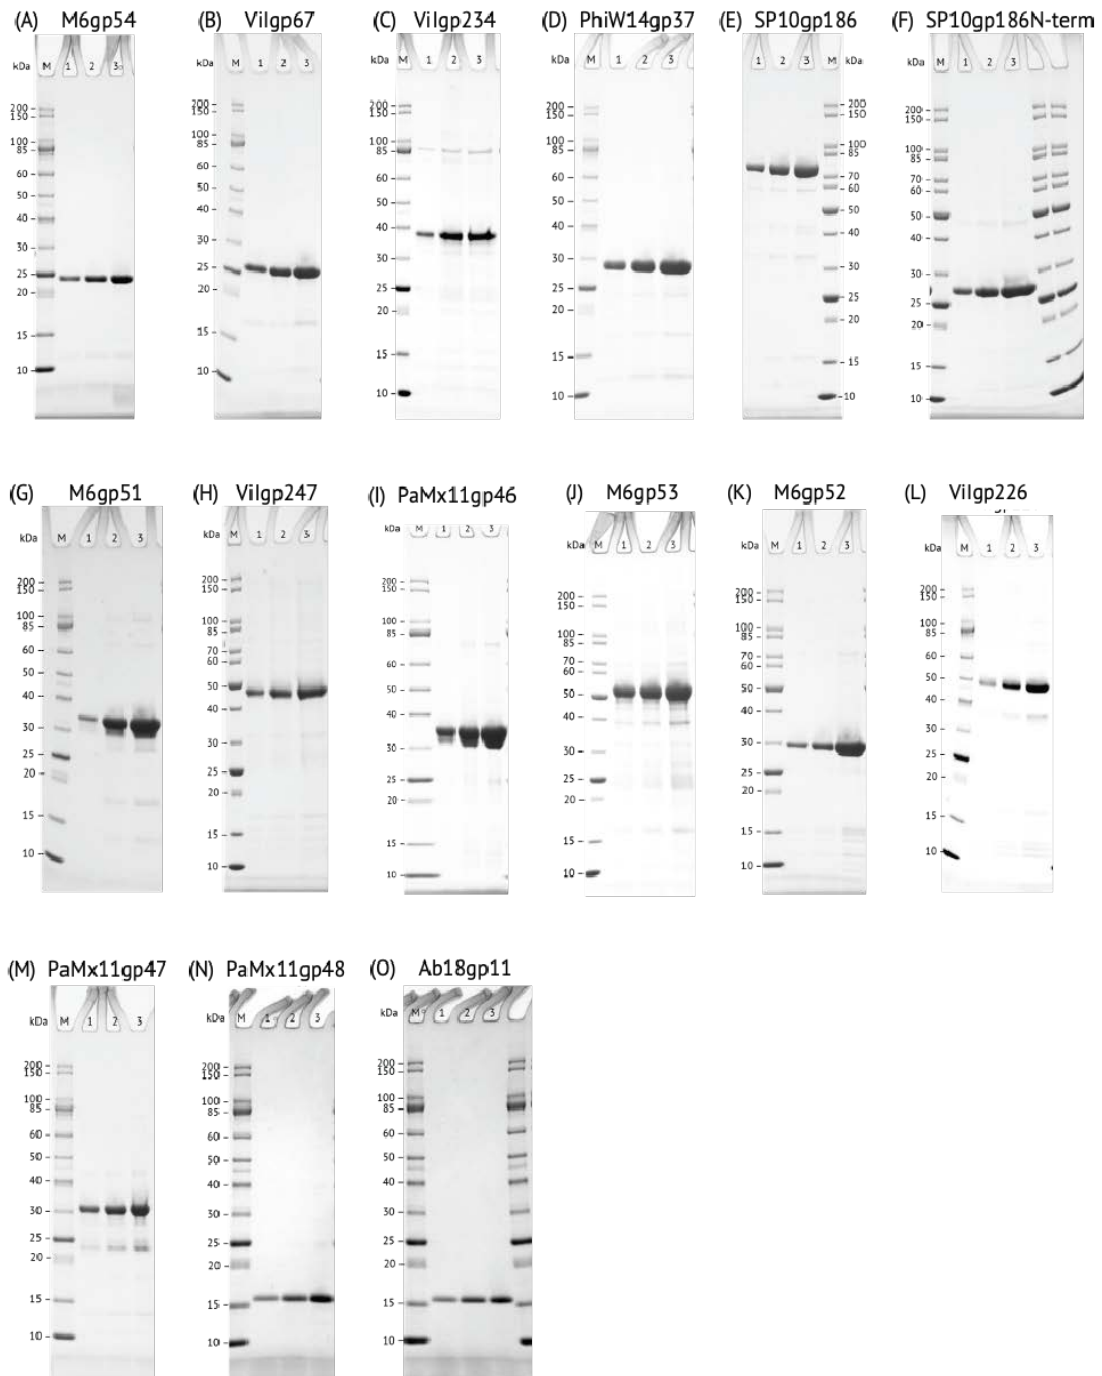

**Fig. S1. SDS-PAGE analysis of recombinant proteins purified in this study.**

(A) through (O) are images of purified proteins analyzed using SDS-PAGE. After electrophoresis, tris-glycine SDS-PAGE gels (10–20%) were stained with Coomassie G-250 and documented using CCD camera of the digital gel documentation system. M, the protein standard ladder. Lane 1, 2, and 3, the purified protein in 1, 2, and 4  $\mu$ g protein loading, respectively, in which the protein concentrations were determined by Bradford protein assay.

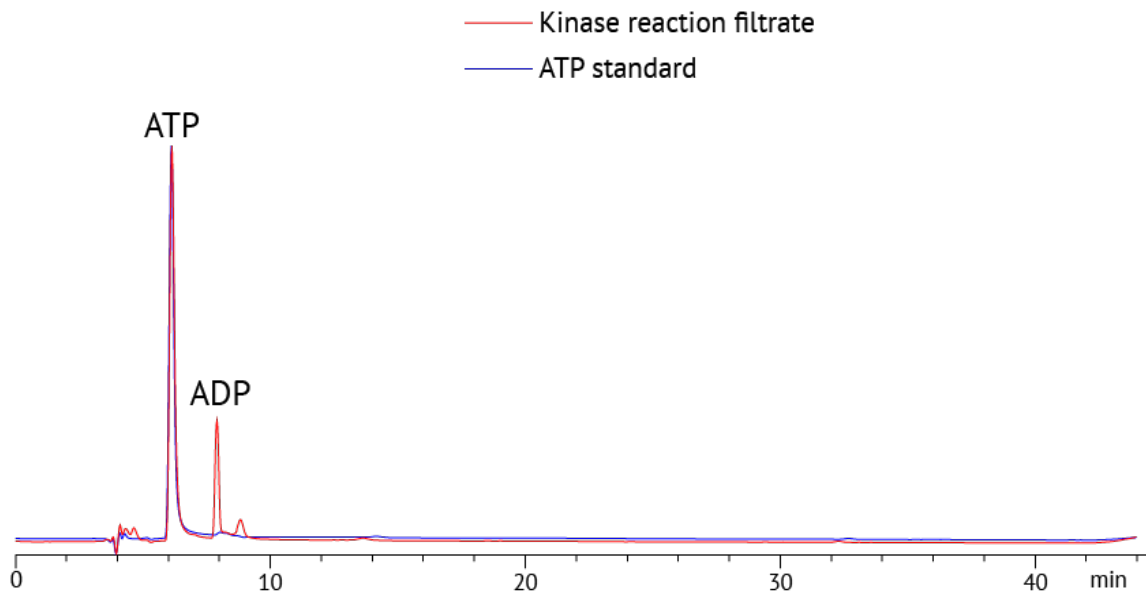

**Fig. S2. Production of ADP during 5-HMUDK reaction.**

A mixture containing 6.5  $\mu\text{g}$  of purified SP8 genomic DNA, 100  $\mu\text{M}$  ATP, and 300 ng of 5-HMUDK was incubated in 1X T4 DNA ligase buffer in a total volume of 60  $\mu\text{l}$  for 1 hour at 30°C. After incubation, samples were filtered through a 5K MWCO spin concentrator (Millipore) and the effluent was analyzed by LC/MS. Two species, ATP and ADP were detected.

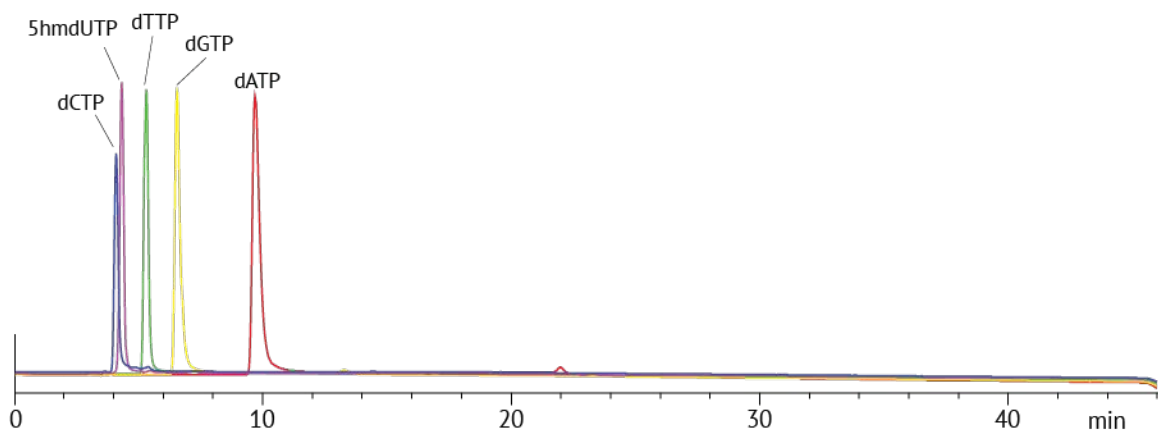

**Fig. S3. Resolution of nucleotide triphosphates by the HPLC method used in this study.**

Each of the nucleotide triphosphate acquired from commercially available source in 100 mM solution was prepared as 1 mM solution in the 1x nucleoside digestion buffer. Then, the 1 mM solutions were incubated at 37°C for 1.5h and approximately 2.5 nmole from each of the solution was subjected to LC/MS analysis using the standard LC method in this study. The resulted chromatography traces were overlayed. From earlier to later retention times, the order of elution is: dCTP, 5-hmdUTP, dTTP, dGTP, and dATP.

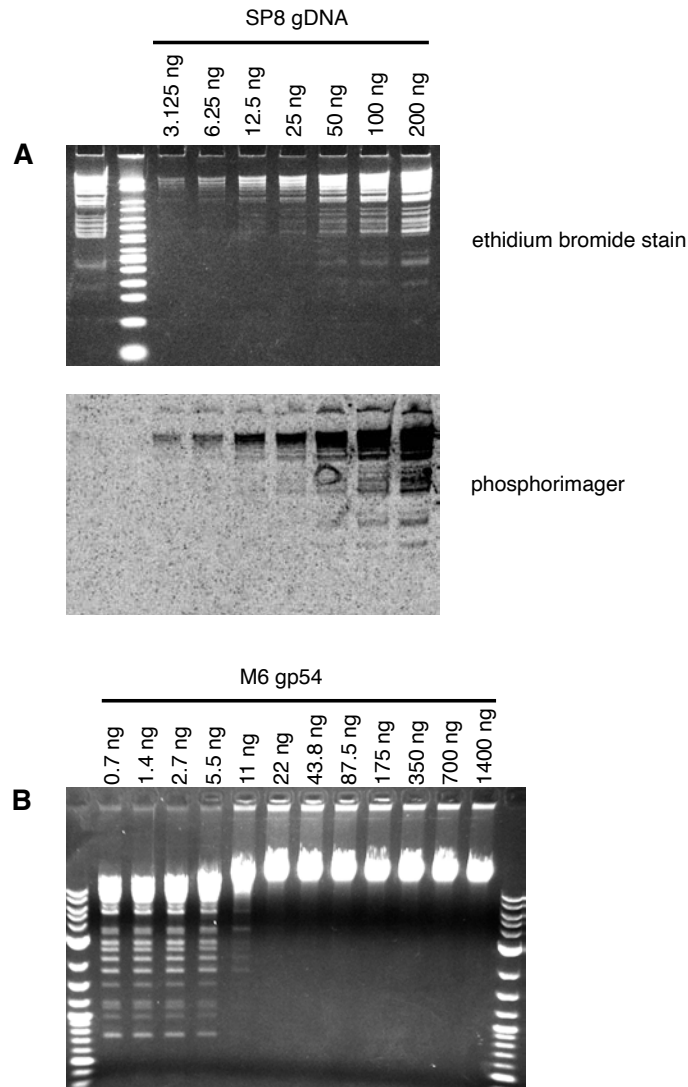

**Fig. S4. 5-HMUDK (M6 gp54) transfers a gamma-phosphate from ATP to 5-hmdU in DNA.**

**(A)** Samples from a 2-fold dilution series of XbaI digested SP8 genomic DNA spanning 200 ng to 3.125 ng were incubated with 1  $\mu$ g of purified M6 gp54 and 25  $\mu$ Ci [ $\gamma$ - $^{32}$ P]ATP in a 50  $\mu$ l reaction containing 50 mM Tris pH 7.5, 10 mM MgCl<sub>2</sub>, and 50  $\mu$ M cold ATP for 1 hour at 30°C. Reactions were quenched with 1X Gel loading dye (NEB #B7024) and electrophoresed through a 1% agarose gel followed by staining with ethidium bromide/UV illumination as well as visualization of radioactivity using a GE Typhoon phosphorimager. **(B)** Reactions containing 200 ng intact SP8 genomic DNA, 50 mM Tris pH 7.5, 10 mM MgCl<sub>2</sub>, 1 mM ATP and a 2-fold dilution series of M6 gp54 spanning 1.4  $\mu$ g to 0.7 ng of enzyme were incubated for one hour at 30°C after which 10 U of NdeI were added to each reaction and incubated for an additional 30 minutes at 37°C before being quenched with 1X NEB Gel loading dye and electrophoresed through 1% agarose, stained and visualized by ethidium bromide/UV illumination.

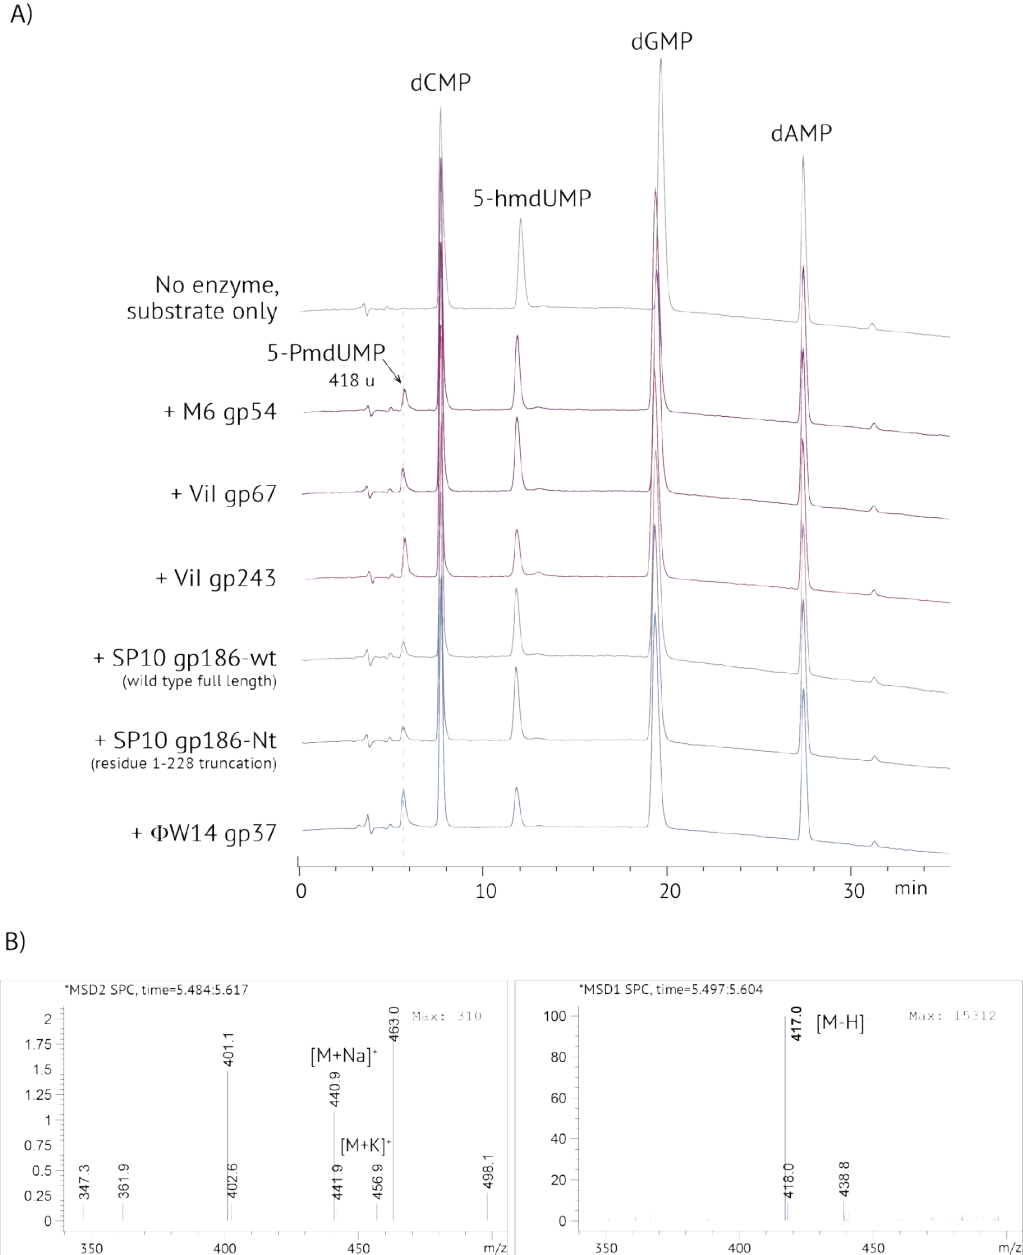

**Fig. S5. Production of 5-PmdUMP by phage encoded 5-hmdU DNA kinases (5-HMUDKs).**

(A) Genomic DNA purified from bacteriophage SP8 (which naturally contains 5-hmdU fully replacing T) was restriction enzyme-digested and incubated with indicated enzyme in the presence of 1 mM ATP for 1 hour at 37 °C. Following incubation, DNA was recovered by spin column purification (Monarch PCR Cleanup Kit, NEB), digested to free nucleotides using phosphatase-free nucleoside digestion mix (NEB), and resolved by LC/MS. The top-most trace derives from substrate incubated in a no-enzyme control reaction. The phosphorylated nucleotide product 5-PmdUMP from the kinase reaction elutes at approximately 5.5 minutes using the LC method described in the method session. (B) The mass signal of 5-PmdUMP nucleotide product from the SP8 DNA reaction with M6 gp54. Positive (+ESI) and negative (-ESI) electrospray ionization modes are presented at left and right panels, respectively.

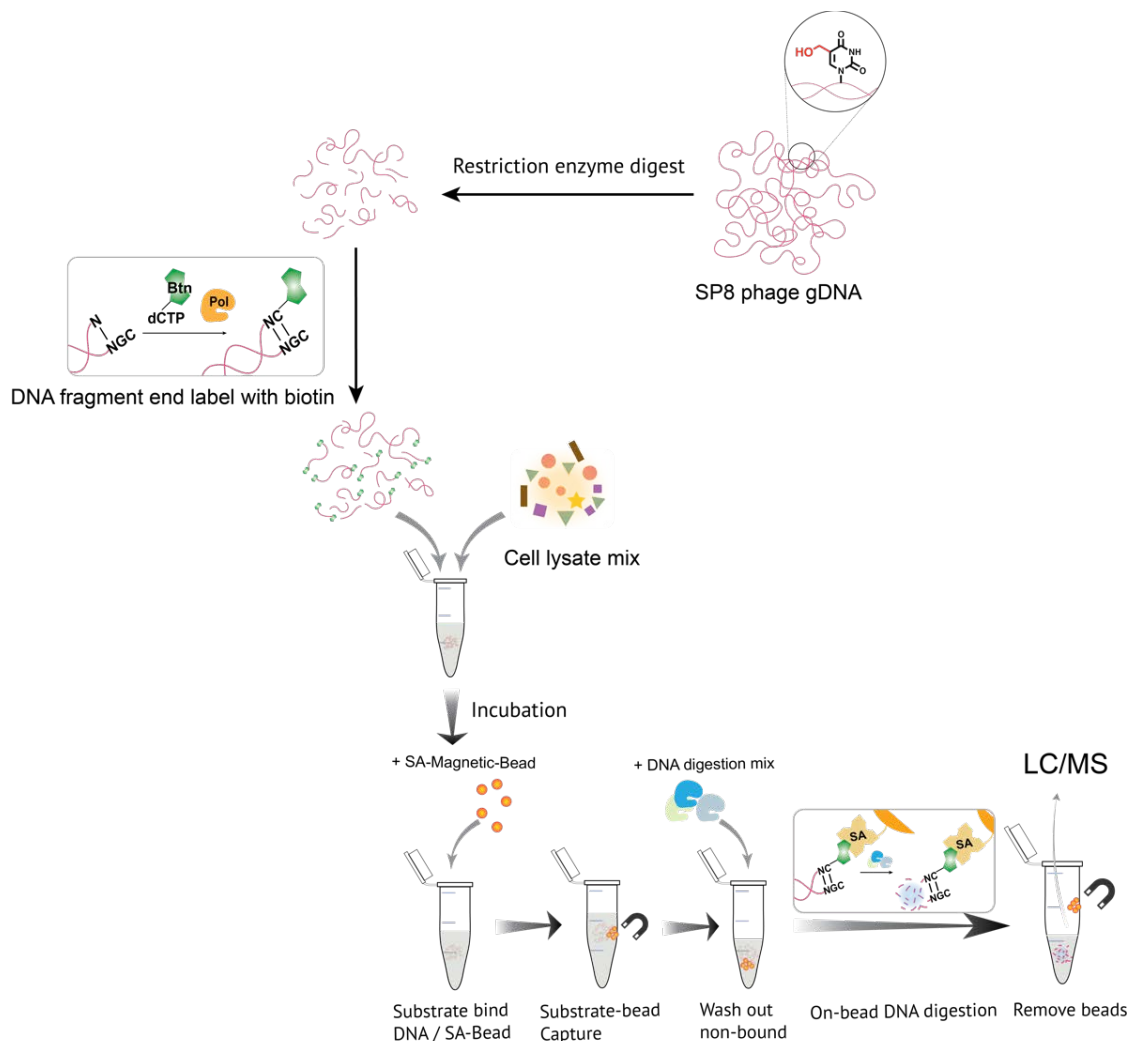

**Fig. S6. General scheme of *ex vivo* hypermodifying enzyme activity assay.**

SP8 genomic DNA (gDNA) extracted from Bacillus phage SP8 was digested with restriction enzyme. The resulted product was labeled with biotinylated nucleotide through the polymerase and purified by silica-based spin column. To perform the *ex vivo* enzyme modification assay, the biotinylated DNA was challenged with *E. coli* lysate which was obtained from the strain transformed with the plasmid harboring the putative thymidine base modifying enzyme gene. The lysate can be prepared as the mixture of the combination of several lysates each different strain with different base modifying enzyme genes. Necessary cofactors can be provided in the reaction buffer. After the reaction in the lysate, the gDNA product was diluted with bead-binding buffer. The mixture was then transferred to the preconditioned streptavidin magnetic beads (SA-magnetic-bead). The gDNA-bead complex was capture by magnet and was further washed with washing buffer, three times. To release the nucleoside from the gDNA-bead complex for HPLC-MS analysis, nucleoside digestion mix (NEB), the cocktail of nucleases and phosphatase reagent, was added to the solution and left for incubation. After digestion step, the beads were captured by magnet, and the supernatant was collected and subjected for HPLC-MS analysis.

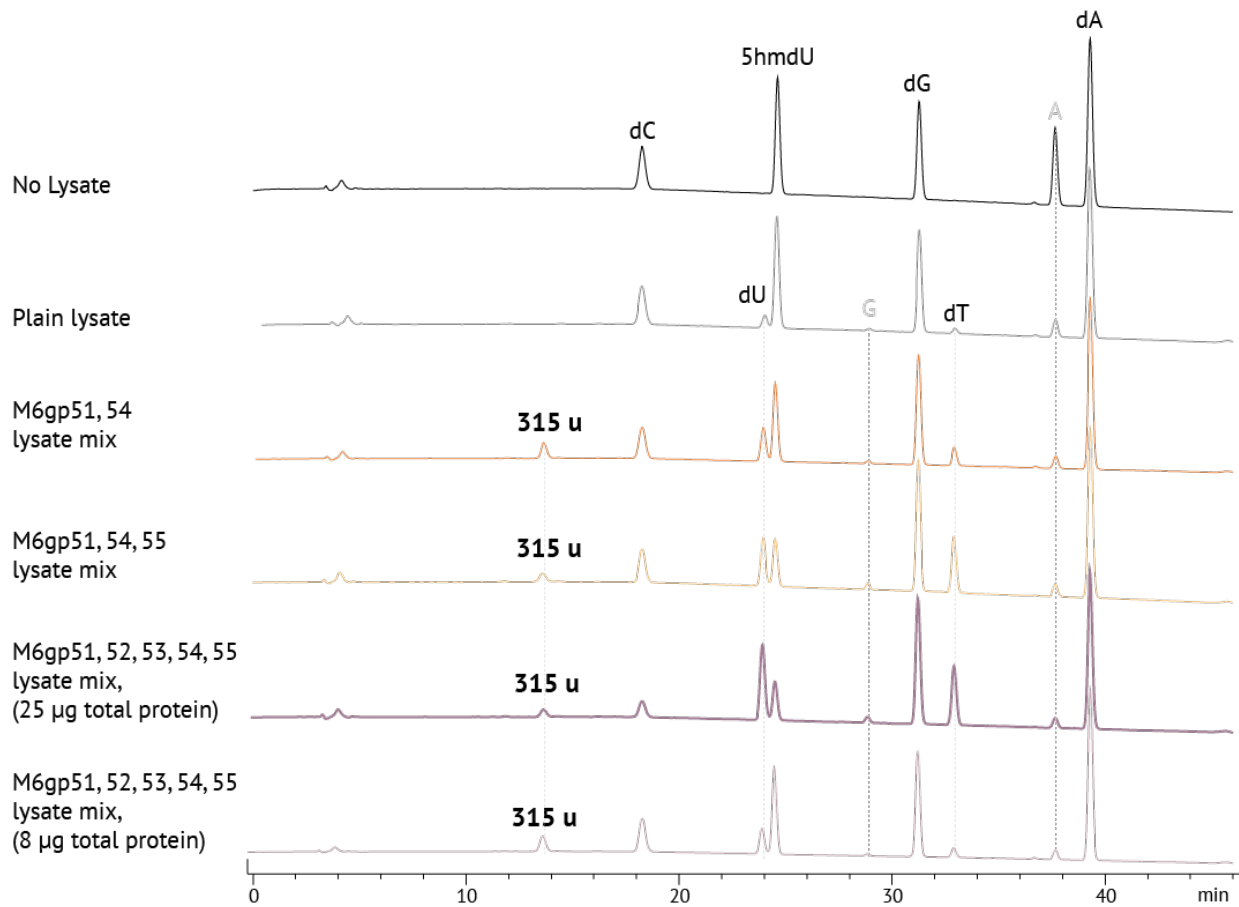

**Fig. S7. Thymidine hypermodification *ex vivo* assay on M6 gene products.**

Biotinylated fragments of SP8 genomic DNA prepared as described in Methods were incubated in buffer (trace 1), plain lysate (trace 2), or combinations of lysates derived from cells expressing the indicated phage M6 gene products. Incubation of substrate DNA with lysates containing gp51 and gp54 was sufficient to produce a new nucleoside species with 315 u nominal mass.



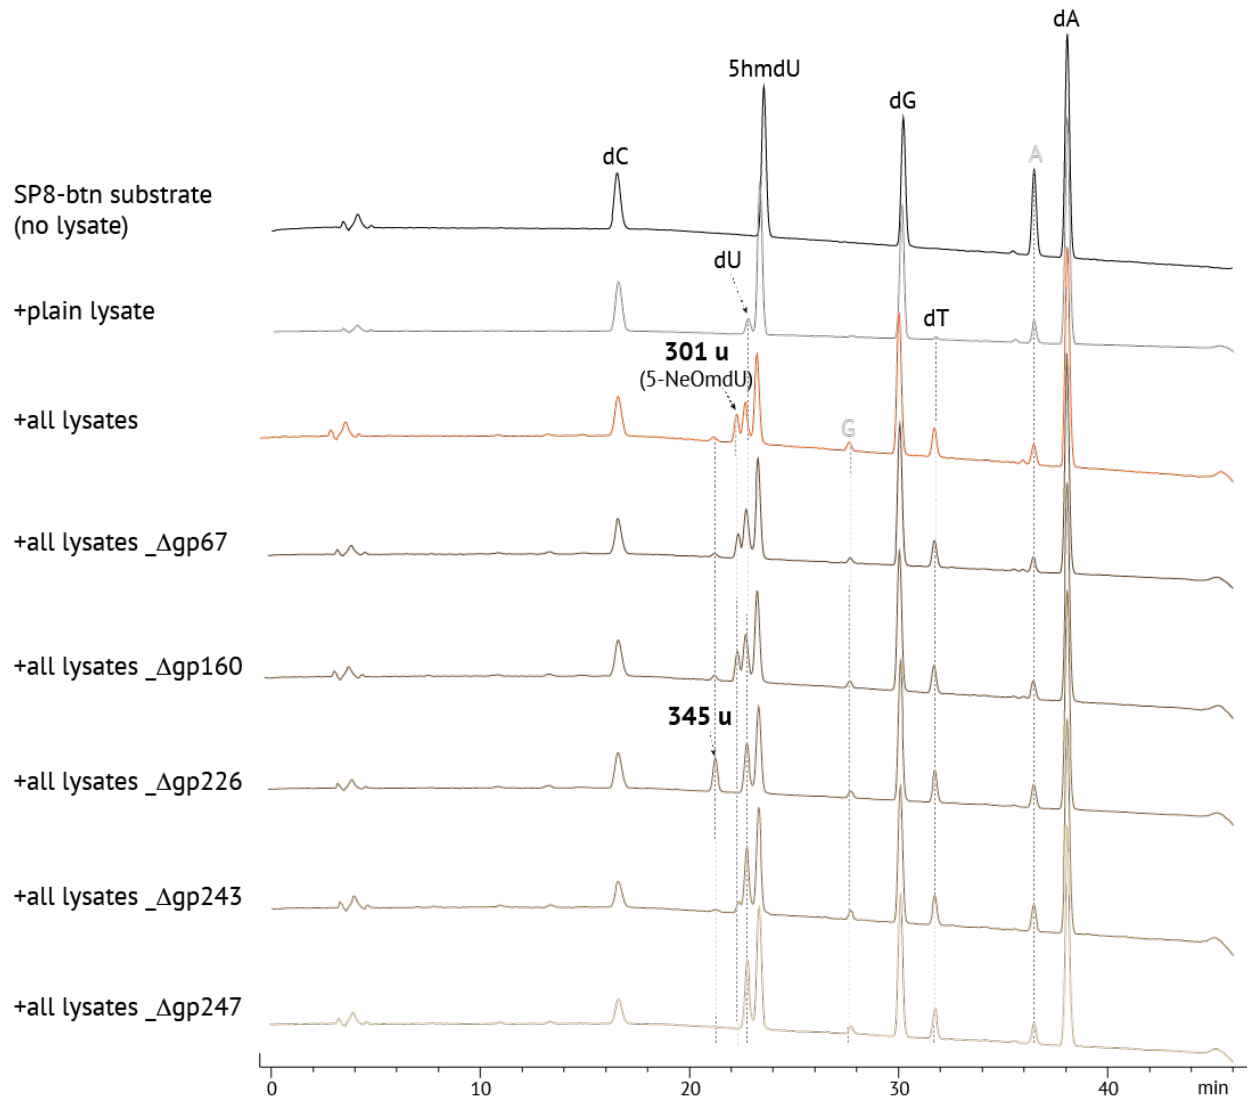

**Fig. S8. Thymidine hypermodification *ex vivo* assay on phage ViI gene products.**

Biotinylated fragments of SP8 genomic DNA prepared as described in Methods were incubated in buffer (trace 1), plain lysate (trace 2), or combinations of lysates derived from cells expressing the indicated phage ViI gene products. Incubation of substrate DNA with lysates containing five gene products (gp67, gp160, gp226, gp243, and gp247) could form the mature modification 5-NeOmdU as seen in the third trace from the top. The presence of either gp67 or gp243, both predicted 5-hmdU DNA kinases, together with gp160, gp226, and gp247 was sufficient to produce 5-NeOmdU. The gp226 drop-out reaction produced a nucleoside with nominal mass of 345 u, which is 44 u greater than the mature product, 5-NeOmdU.

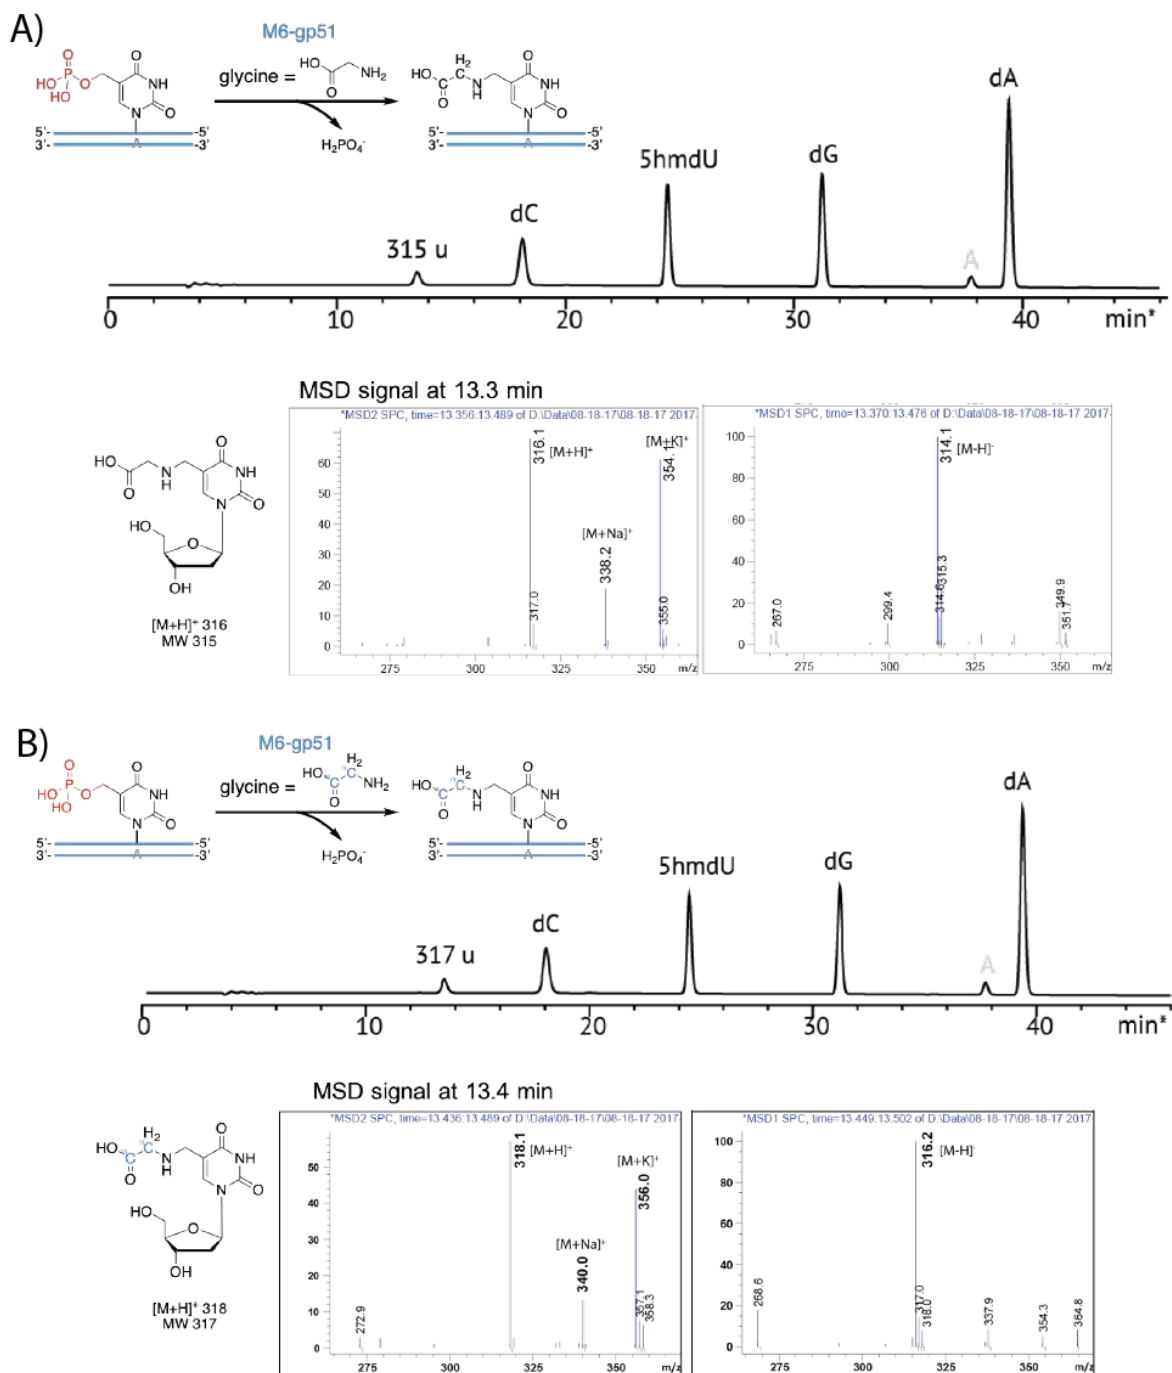

**Fig. S9. Stable isotope labeling experiment of M6 gp54, M6 gp51 and <sup>13</sup>C labeled glycine.**

DNA containing 5-hmdU fully substituting for dT was incubated with M6 gp54 (5-hmdU DNA kinase) and M6 gp51 in the presence of 1 mM glycine (top trace and mass spectra) or 1 mM stable isotope labeled glycine (<sup>13</sup>C<sub>2</sub>, 97-99%) (Cambridge Isotope Laboratory, Inc., Tewksbury, MA) (lower trace and spectra). The formation of a 317 u nucleoside in the presence of labeled glycine confirms that the added mass is derived from glycine.

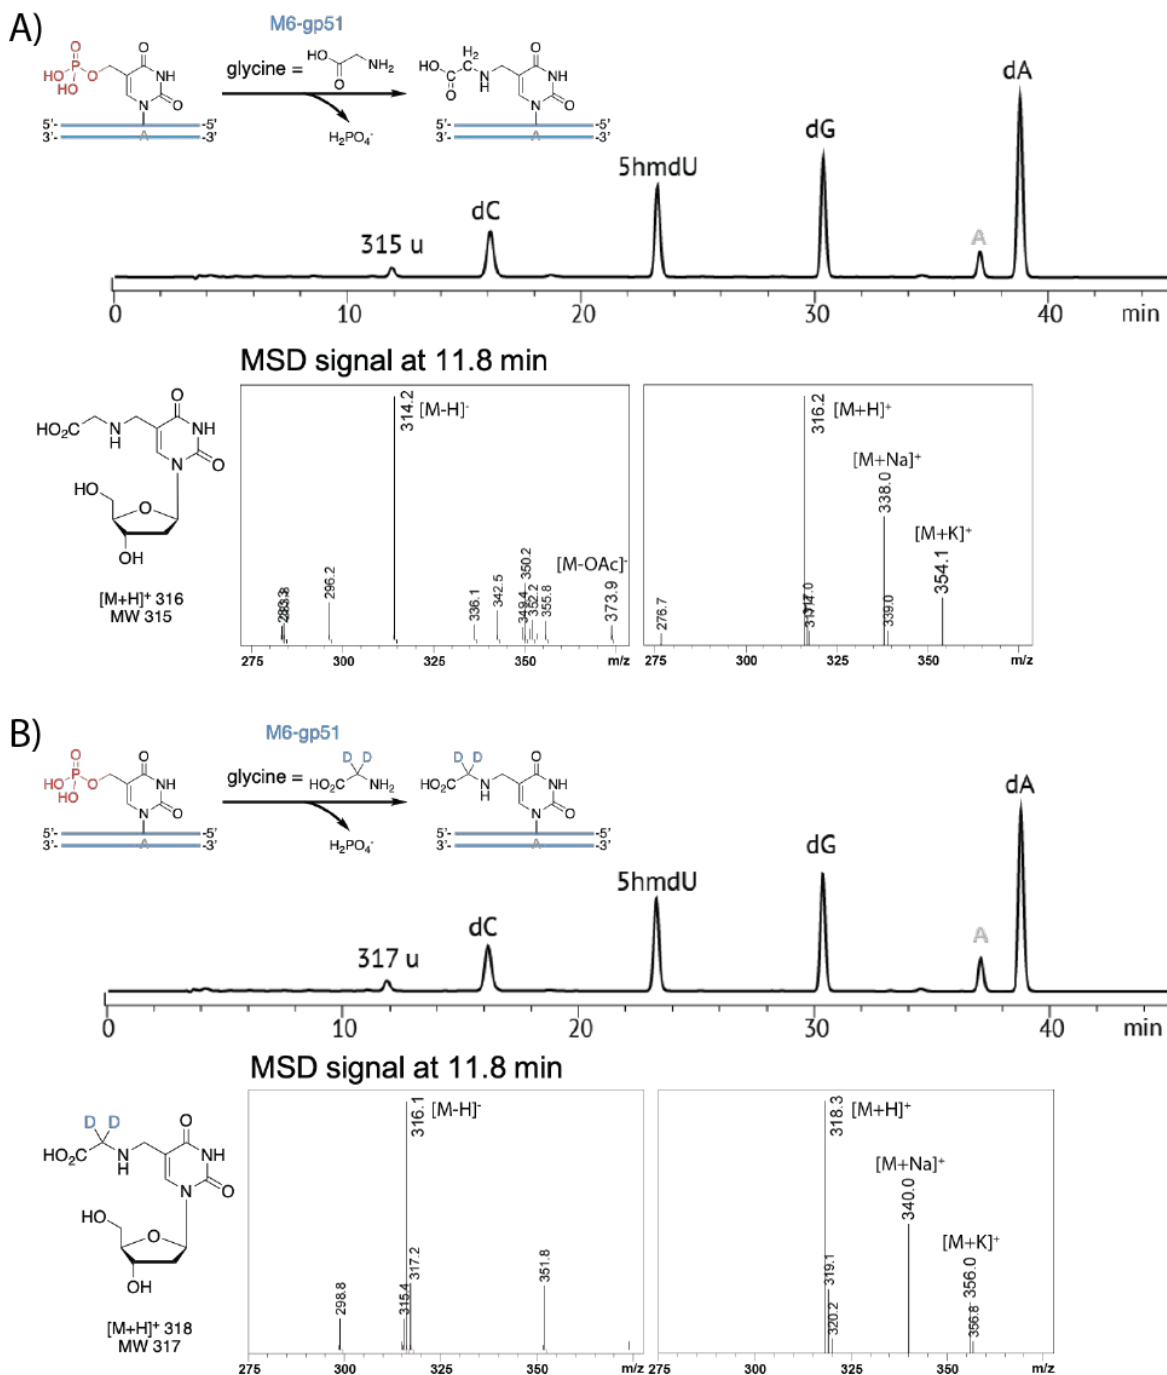

**Fig. S10. Incorporation of deuterium labeled substrate into DNA shows retention of both protons at alpha carbon of glycine.**

DNA containing 5-hmdU substituting for dT was incubated with M6 gp54 and M6 gp51 in the presence of 1 mM glycine (top trace and mass spectra) or 1 mM stable isotope labeled glycine (2,2-D<sub>2</sub>, 98%) (Cambridge Isotope Laboratory, Inc., Tewksbury, MA) (lower trace and spectra). The formation of a 317 u nucleoside in the presence of the doubly deuterated glycine indicates that both deuteriums are retained on the alpha carbon following group transfer to the base.

A

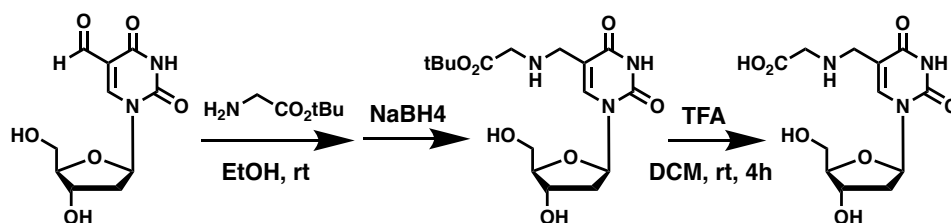

B

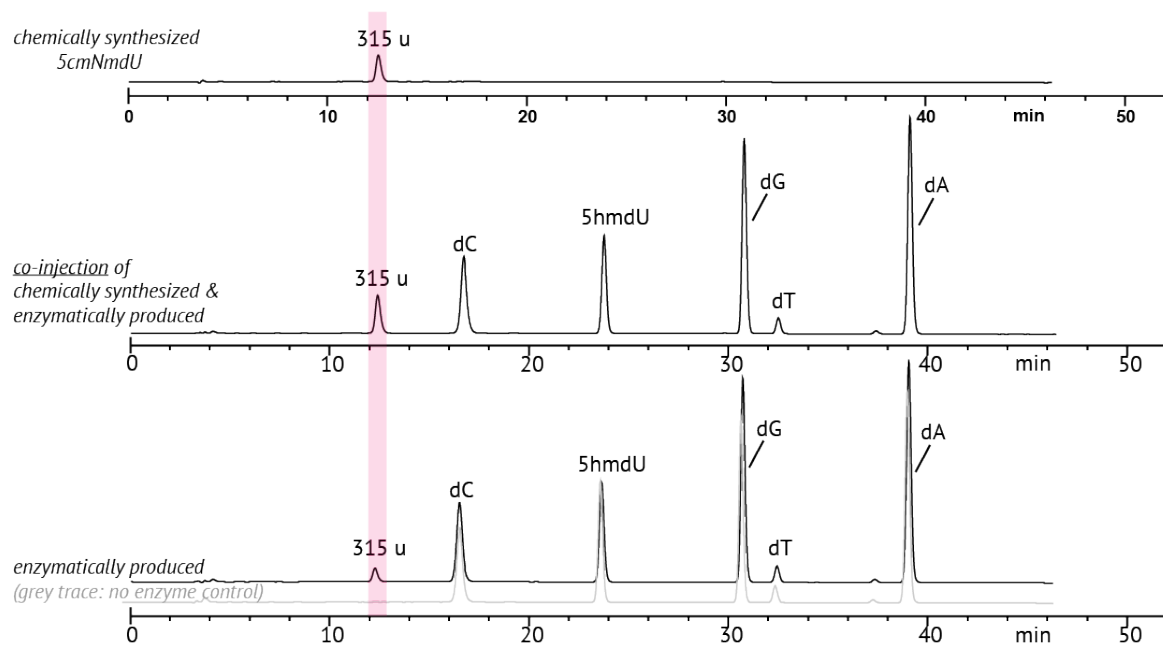

**Fig. S11. Confirmation of  $N^\alpha$ -glycylthymidine formation by chemical synthesis of nucleoside standard.**

$N^\alpha$ -GlyT was synthesized by reductive amination of 5-formyluridine as described in Methods and indicated in by the scheme in panel (A). As shown in panel (B), the synthetic  $N^\alpha$ -GlyT is indistinguishable from the enzymatically produced nucleoside both in nominal mass and retention time.

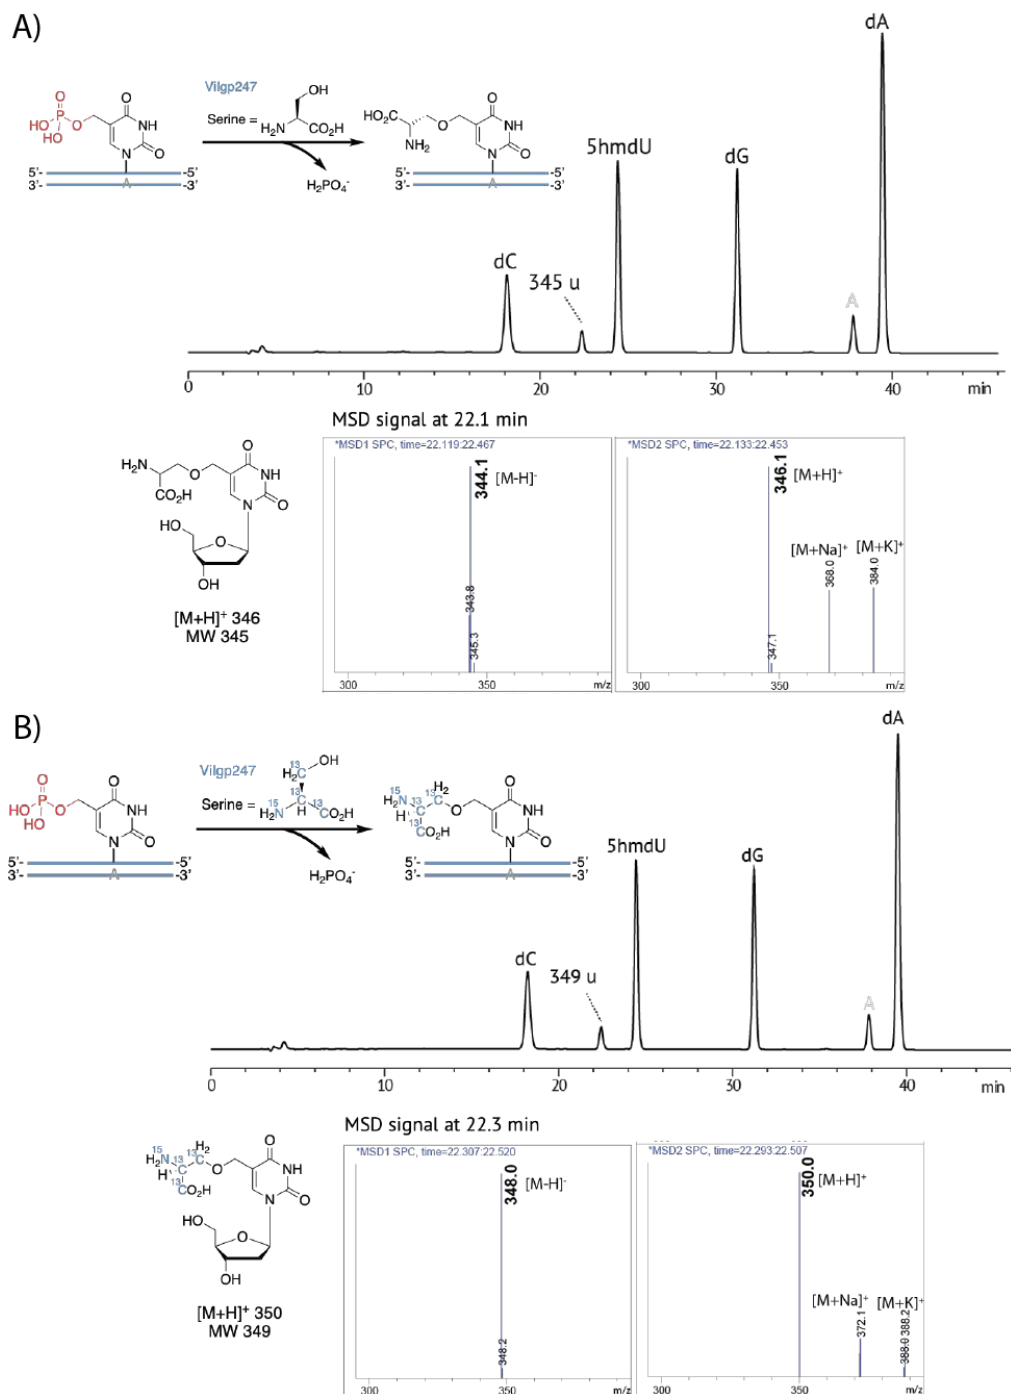

**Fig. S12. Stable isotope DNA labeling experiment using recombinantly expressed and purified enzymes from phage Vi1 and  $^{13}\text{C}$  labeled serine.**

The DNA substrate containing 5-PmdU was incubated with purified Vi1 gp247 and 1 mM L-serine (A) or 1 mM stable isotope labeled L-serine ( $^{13}\text{C}_3$ , 99%;  $^{15}\text{N}$ , 99%) (Cambridge Isotope Laboratory, Inc., Tewksbury, MA) (B) and products were digested to free nucleosides and subjected to LC/MS analysis. LC/MS shows production of nucleoside with nominal mass of 345 u for (A) but with stable isotope labeled serine (B) yielded a nucleoside with nominal mass of 349 u.

A

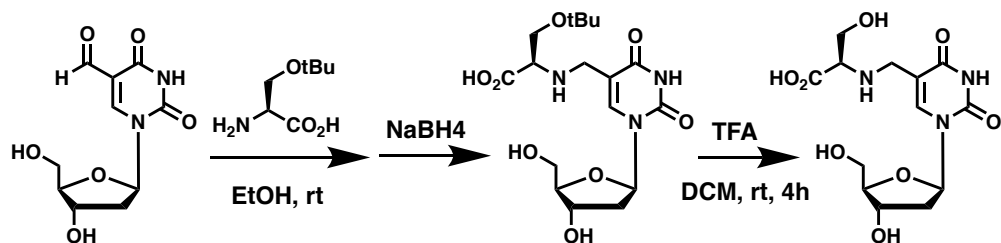

B

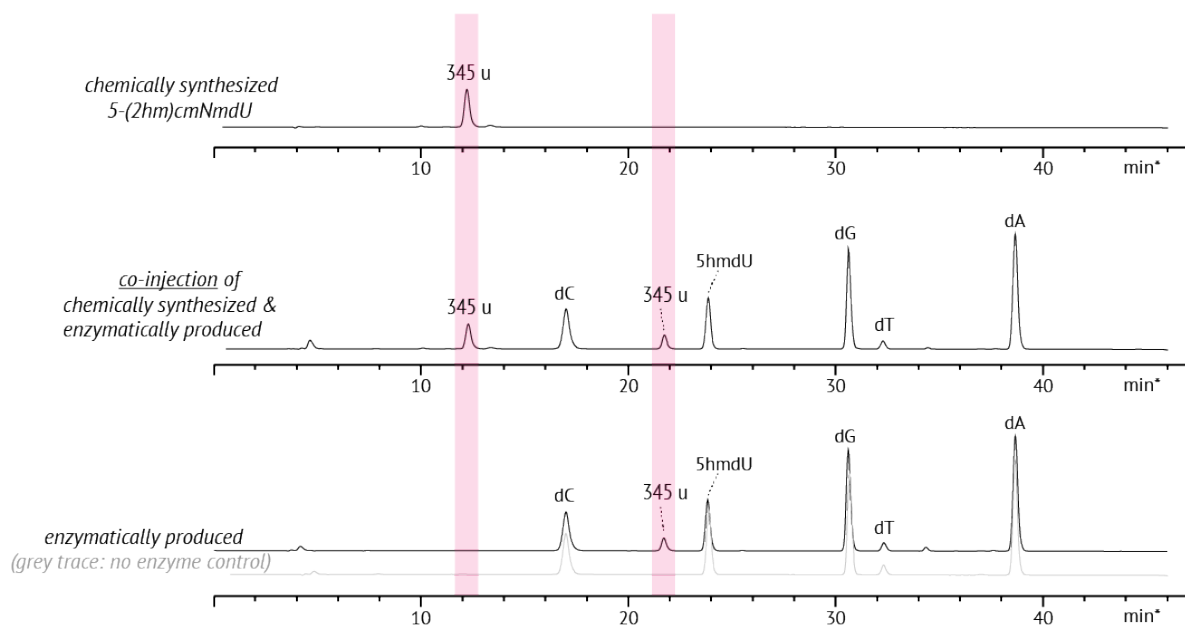

**Fig. S13. Chemical synthesis shows  $N^{\alpha}$ -serinylthymidine is not the isomer produced by Vii gp247.**

$N^{\alpha}$ -SerT was synthesized by reductive amination of 5-formyluridine as described in Methods and depicted in the scheme shown in (A). As shown in (B), the synthetic  $N^{\alpha}$ -SerT has a different retention time, albeit identical nominal mass, compared to the enzymatically produced nucleoside.

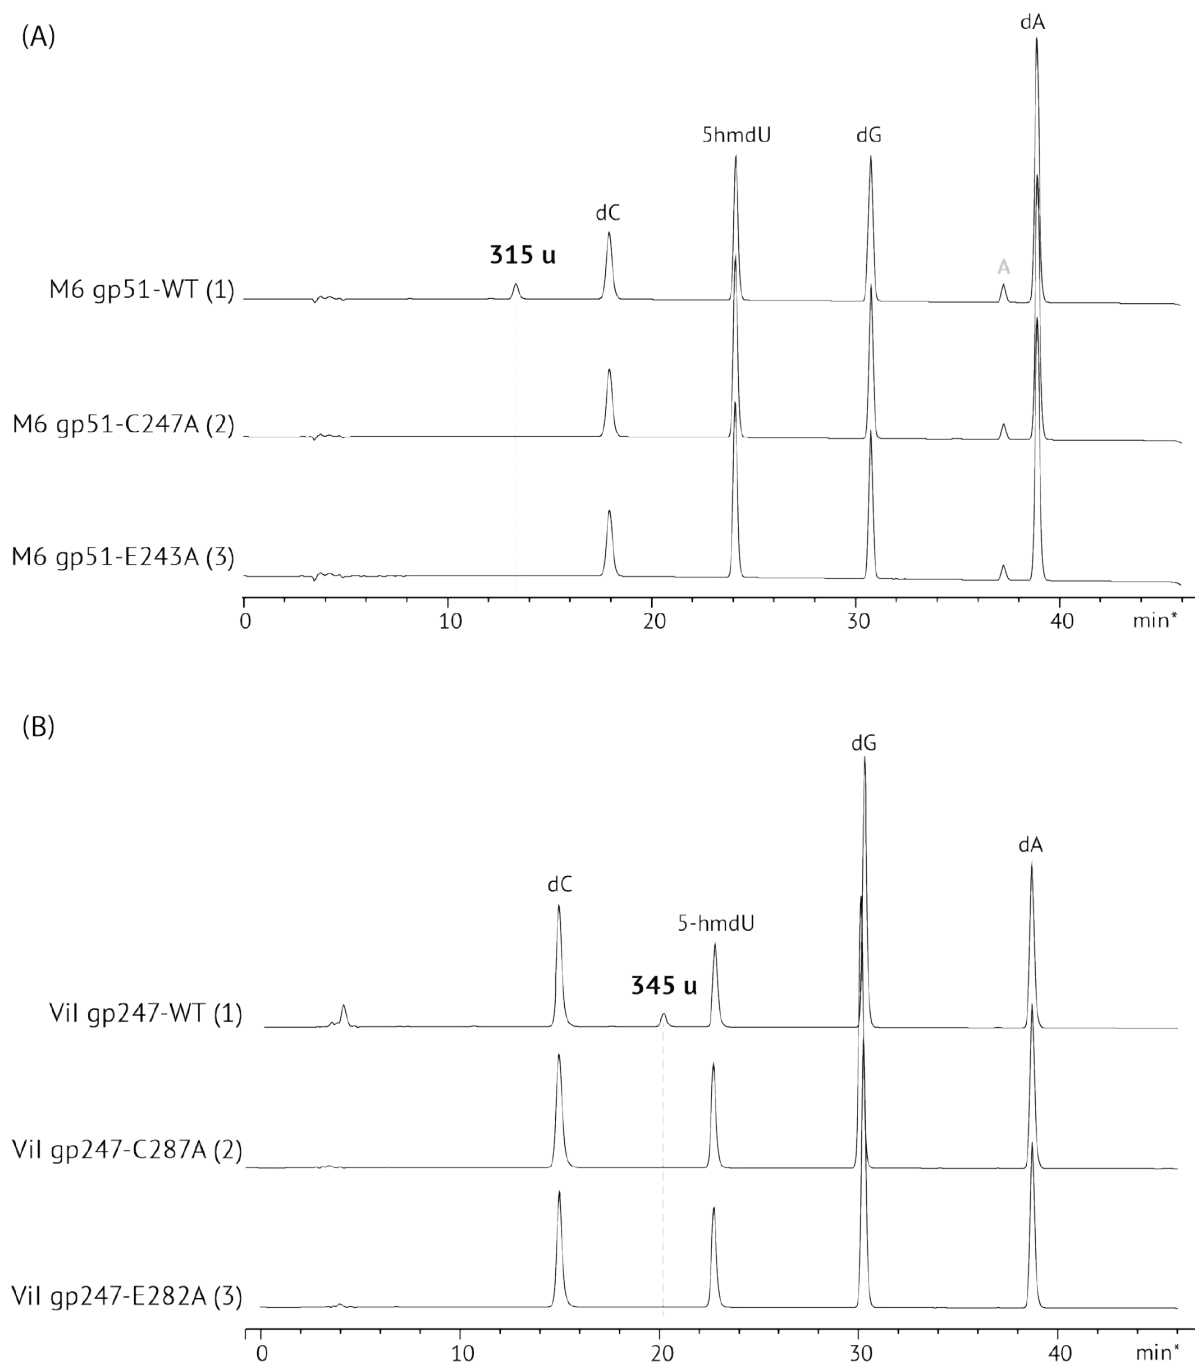

**Fig. S14. Mutation of conserved residues in presumptive active abolish activity of M6 gp51 and Vil gp247.**

Clade2 aGPT-PpIase proteins contain strictly conserved glutamate and cysteine residues predicted to be involved in enolization of *O4* and Michael addition at *C6*, respectively. Wild-type and mutant enzymes were incubated with substrate 5-PmdU containing DNA as described in methods and the products analyzed by LC/MS of nucleoside digests. Mutation of conserved presumptive active-site residues in M6 gp51 (A) and Vil gp247 (B) abrogate enzyme function.





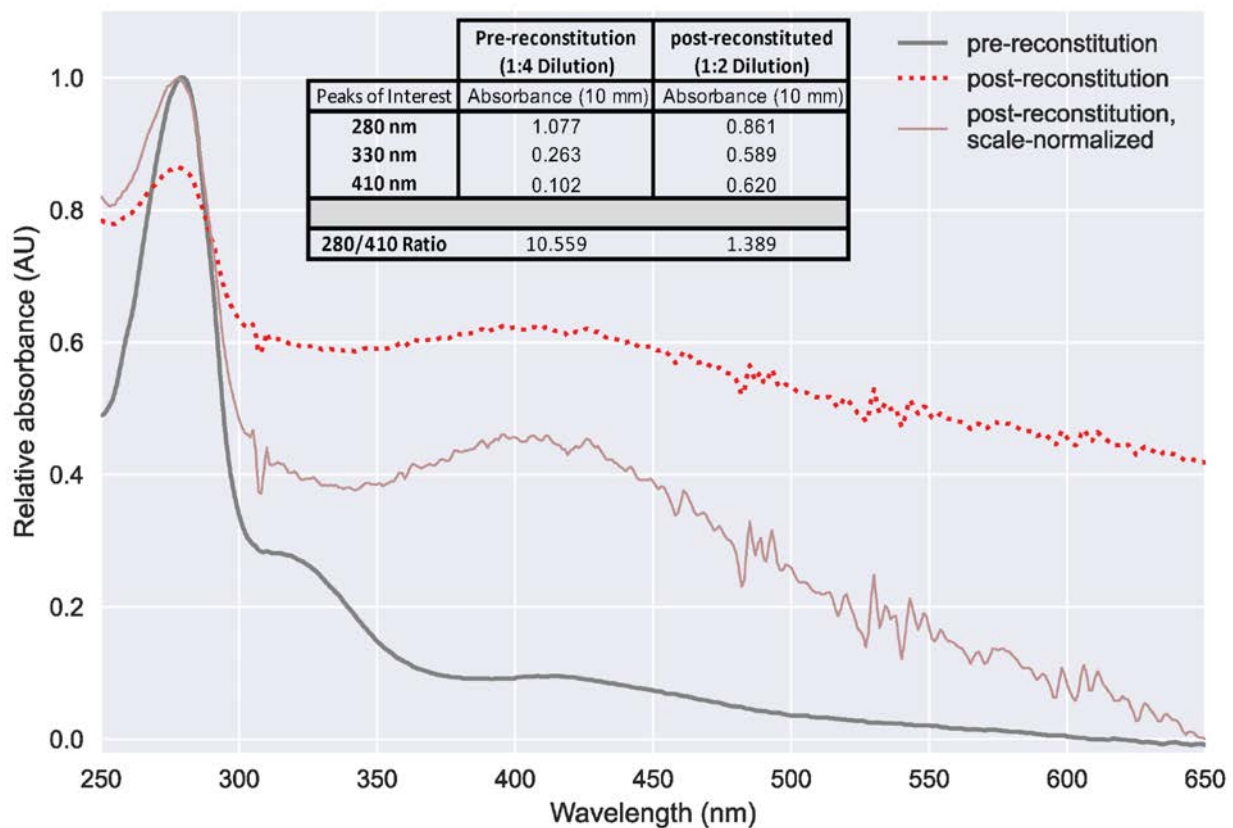

**Fig. S16. UV-Vis absorbance spectra of purified and reconstituted M6 gp53.**

UV-Vis absorbance spectrum of purified M6 gp53 shows increase in absorbance in ~410 nm region following anaerobic iron-sulfur cluster reconstitution as described in methods. Determination of iron content by ferrozine assay yielded ~9 Fe per protein, suggesting two 4Fe-4S clusters per monomer.

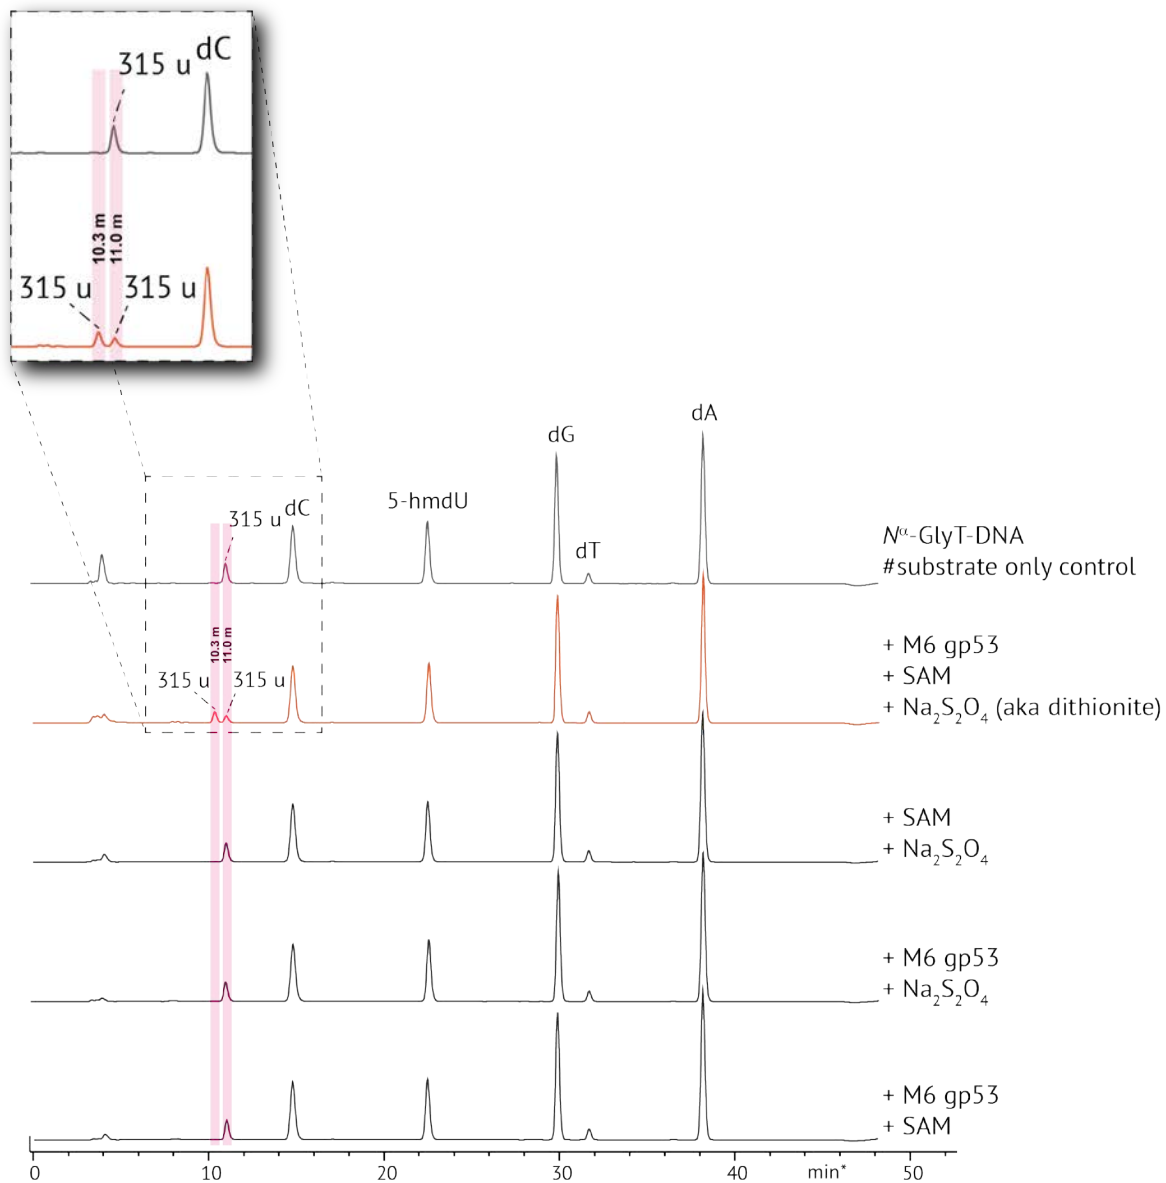

**Fig. S17. M6 gp53 catalyzed isomerization of  $N^\alpha$ -GlyT is dependent on SAM and dithionite in vitro.**

Substrate DNA containing  $N^\alpha$ -GlyT was prepared by incubation of 5-hmdU DNA with M6 gp54 (5-HMUDK) and M6 gp51 (Pfam: aGPT-Pplase2, also coined as AA:DNA transferase) and purified by spin column (Monarch PCR cleanup kit, NEB).  $N^\alpha$ -GlyT in substrate confirmed by LC/MS analysis of nucleoside digests as shown in the first trace from the top.  $N^\alpha$ -GlyT substrate was reacted with gp53 in the presence of SAM and sodium dithionite, producing  $C^\alpha$ -GlyT, as shown in the second trace. Reactions leaving out enzyme, SAM, or sodium dithionite failed to produce  $C^\alpha$ -GlyT, as shown in the third, fourth, and fifth traces, respectively.

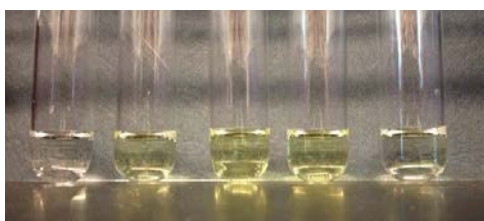

M6gp52 FPLC fractions

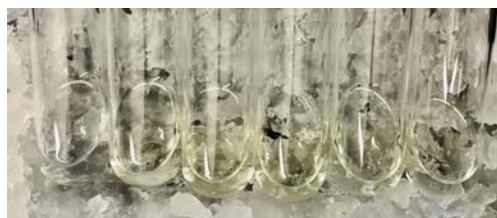

Vilgp226 FPLC fractions

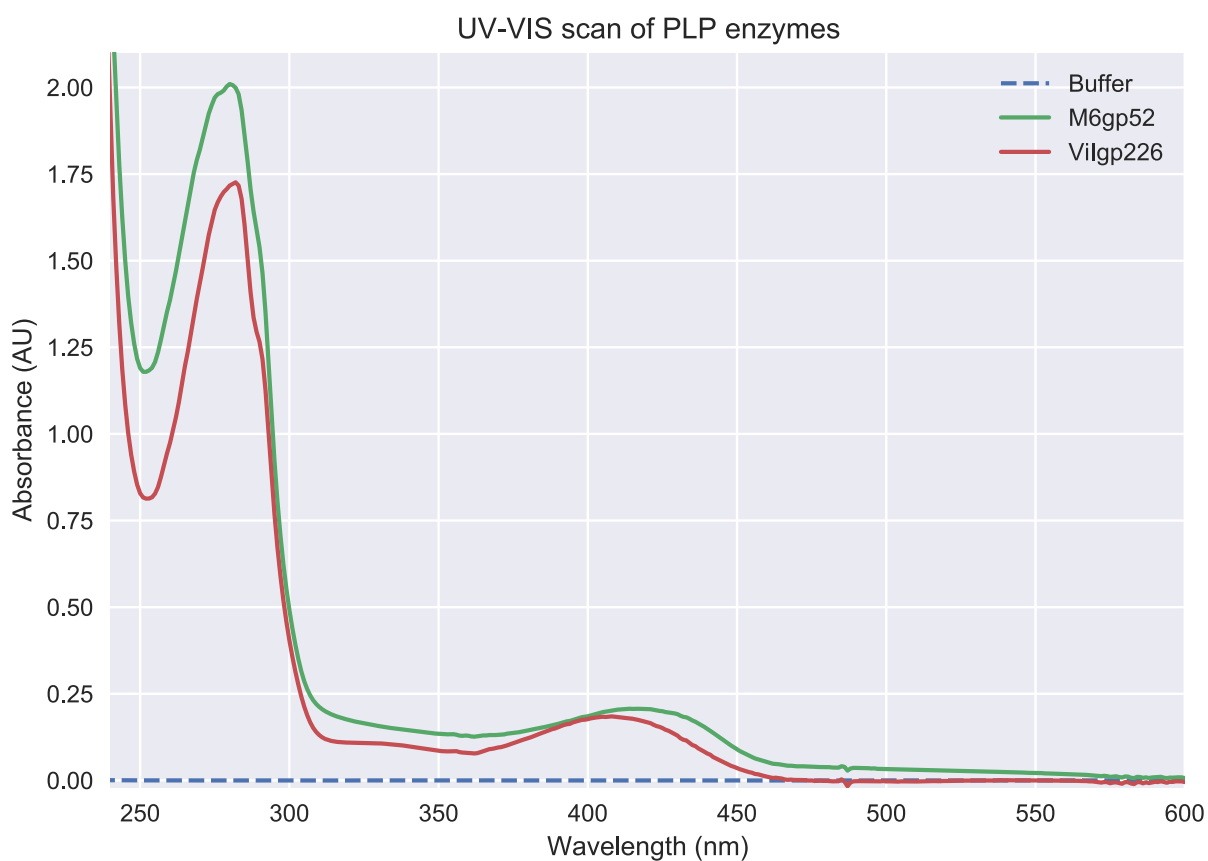

**Fig. S18. Visual inspection and UV-Vis Spectra of purified M6 gp52 and Vil gp226 suggest presence of copurified PLP-cofactor.**

Chromatographic fractions obtained during purification of M6 gp52 and Vil gp226 have visible yellow hue by naked eye. UV-Vis spectra of the resulting purified proteins show absorbance peaks in the 420-450 nm range characteristic of PLP-dependent enzymes.

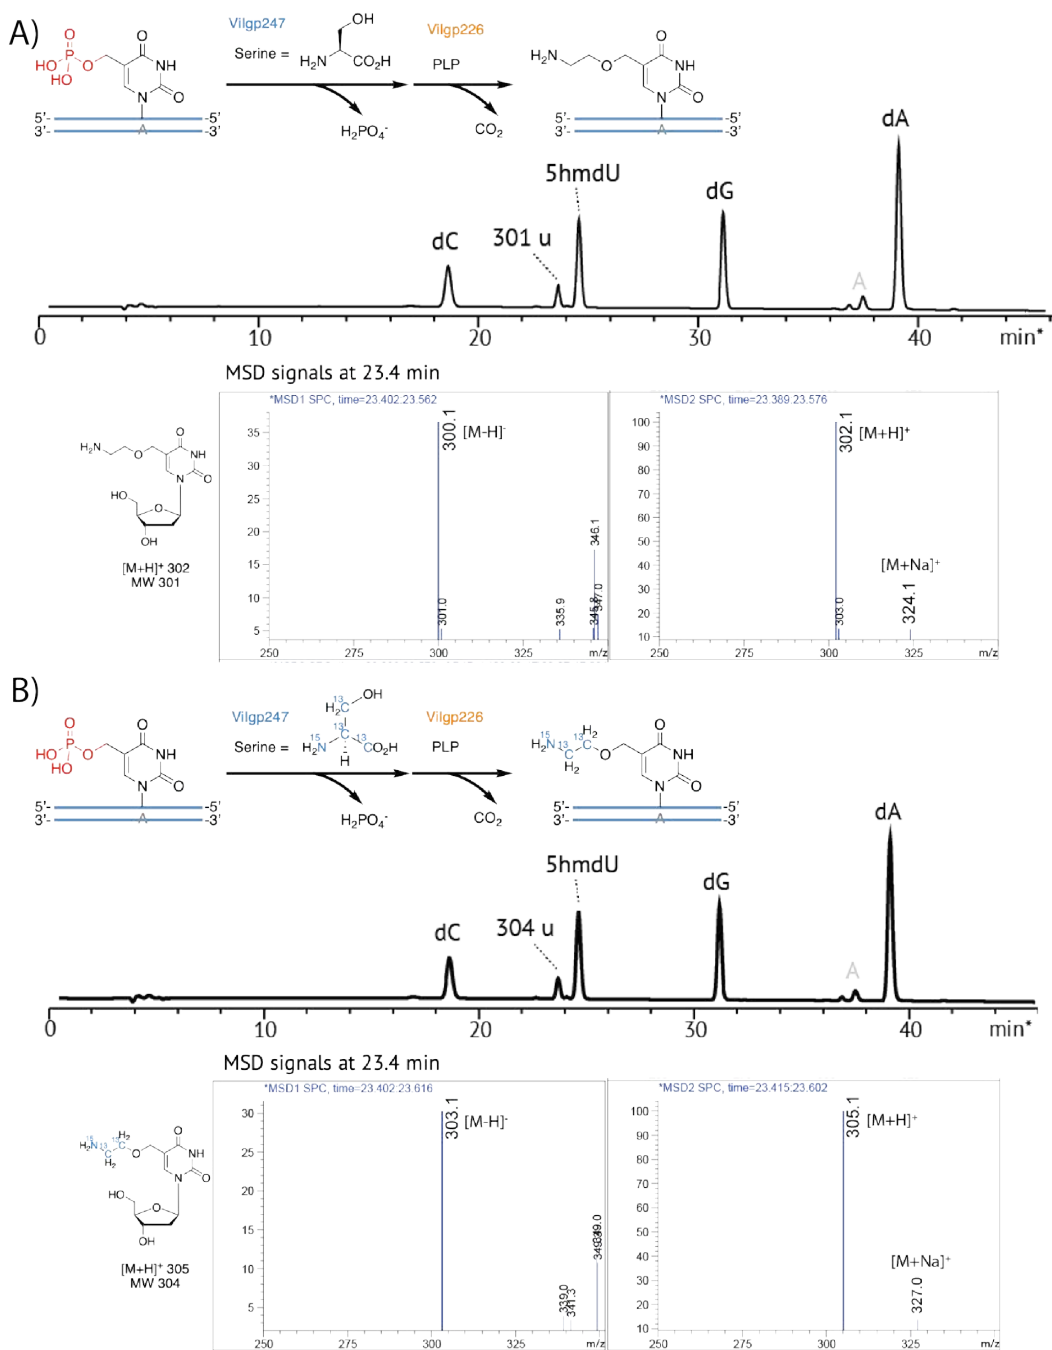

**Fig. S19. Decarboxylation of *O*-serinylnucleoside formed with stable isotope labeled serine.**

The DNA substrate containing 5-PmdU was incubated with purified Vil gp247 and Vil gp226 in the presence of 1 mM L-serine (A) or 1 mM stable isotope labeled L-serine ( $^{13}\text{C}_3$ , 99%;  $^{15}\text{N}$ , 99%) (Cambridge Isotope Laboratory, Inc., Tewksbury, MA) (B) and products were digested to free nucleosides and subjected to LC/MS analysis. LC/MS shows production of nucleoside with nominal mass of 301 u for (A) but with stable isotope labeled serine (B) yielded a nucleoside with nominal mass of 304 u.

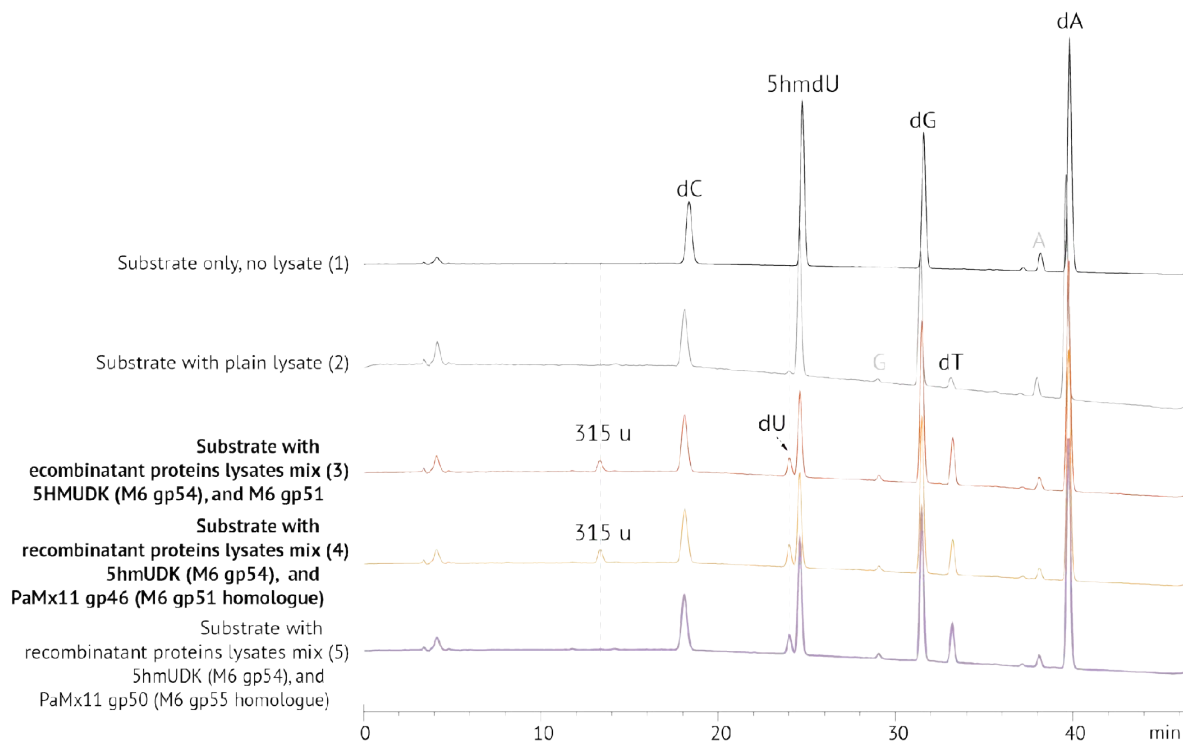

**Fig. S20. PaMx11 gp46 produces  $N^{\alpha}$ -glyT.**

Biotinylated fragments of SP8 genomic DNA prepared as described in Methods were incubated in buffer (trace 1), plain lysate (trace 2), or combinations of lysates derived from cells expressing recombinant M6 gp54 (5-HMUDK) and M6 gp51 (Pfam: aGPT-Pplase2, coined as AA:DNA transferase) (trace3), M6 gp54 and PaMx11 gp46 (an M6 gp51 ortholog) (trace 4), or M6 gp54 and PaMx11 gp50 (an M6 gp55 ortholog). Incubation of substrate DNA with lysates containing M6 gp54 and PaMx11 gp46 was sufficient to produce a nucleoside indistinguishable from the  $N^{\alpha}$ -GlyT nucleoside produced by reaction with M6 gp54 and M6 gp51.

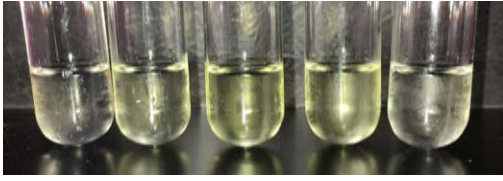

PaMx11gp47 FPLC fractions

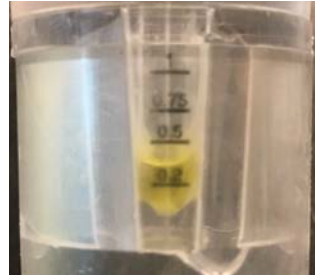

Ab18gp10 concentrate

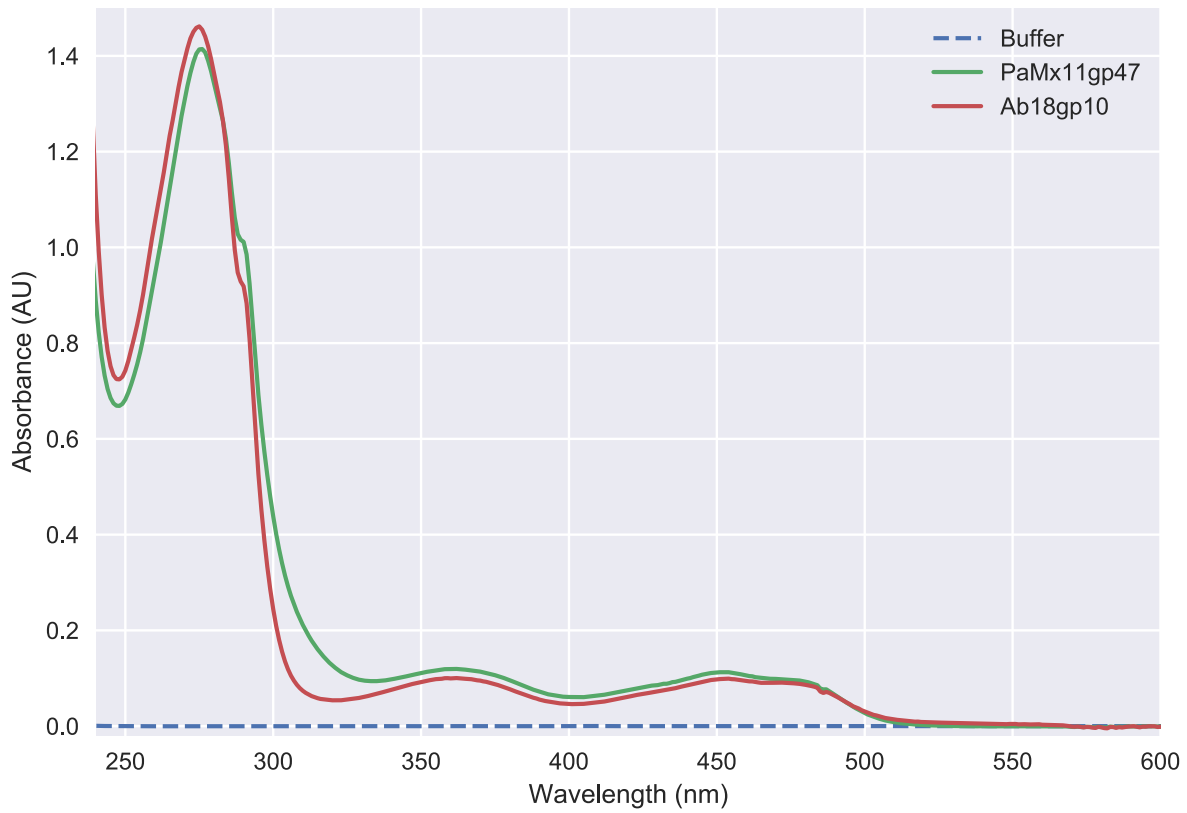

**Fig. S21. Visual inspection and UV-Vis Spectra of purified PaMx11 gp47 and Ab18 gp10 suggest they are flavoproteins.**

Purified PaMx11 gp47 and Ab18 gp10 have a yellow hue visible to the naked eye. UV-Vis spectra of the resulting purified proteins show two absorbance peaks at ~360 nm and ~455 nm characteristic of proteins containing a flavin cofactor.

**Table S1 Plasmids used in this study**

| Name    | Select | Origin | Promoter | Encoding           | Prot ID accession | Native/synthetic |
|---------|--------|--------|----------|--------------------|-------------------|------------------|
| pYJL068 | Kan    | ColE1  | T7       | M6 gp54            | YP_001294562      | native gene seq. |
| pYJL331 | Kan    | ColE1  | T7       | PaMx11 gp49        | YP_009196302      | gene synthesis   |
| pYJL085 | Kan    | ColE1  | T7       | ViI gp67           | YP_004327432      | native gene seq. |
| pYJL087 | Kan    | ColE1  | T7       | ViI gp243          | YP_004327565      | native gene seq. |
| pYJL082 | Kan    | ColE1  | T7       | ΦW14 gp37          | YP_003358891      | native gene seq. |
| pYJL028 | Kan    | ColE1  | T7       | SP10 gp186         | YP_007003443      | native gene seq. |
| pYJL033 | Kan    | ColE1  | T7       | SP10 gp186NT       | YP_007003443      | native gene seq. |
| pYJL019 | Kan    | ColE1  | T7       | M6 gp51            | YP_001294559      | native gene seq. |
| pYJL088 | Kan    | ColE1  | T7       | ViI gp247          | YP_004327568      | native gene seq. |
| pYJL292 | Kan    | ColE1  | T7       | PaMx11 gp46        | YP_009196299      | gene synthesis   |
| pYJL078 | Kan    | ColE1  | T7       | M6 gp53            | YP_001294561      | native gene seq. |
| pYJL035 | Kan    | ColE1  | T7       | M6 gp52            | YP_001294560      | native gene seq. |
| pYJL037 | Kan    | ColE1  | T7       | ViI gp226          | YP_004327553      | native gene seq. |
| pYJL120 | Kan    | ColE1  | T7       | PaMx11 gp47        | YP_009196300      | gene synthesis   |
| pYJL118 | Kan    | ColE1  | T7       | PaMx11 gp48        | YP_009196301      | gene synthesis   |
| pYJL121 | Kan    | ColE1  | T7       | Ab18 gp10          | YP_009125113.1    | gene synthesis   |
| pYJL121 | Kan    | ColE1  | T7       | Ab18 gp11          | YP_009125114.1    | gene synthesis   |
| pDB1282 | Amp    |        | pBAD     | <i>isc</i> cluster |                   |                  |
| pYJL140 | Kan    | pMB1   | Ptac     | GFPuv              |                   | gene synthesis   |
| pYJL366 | Kan    | pMB2   | Ptac     | M6gp51             | YP_001294559      | native gene seq. |
| pYJL367 | Kan    | pMB3   | Ptac     | ΦW14 gp109         | YP_003358963      | native gene seq. |
